# Supplementary material for: A comparative study of CO2 adsorption in a series of zeolites
Source: Royal Society of Chemistry journal article supplement (doi:10.1039/d5cp00538h), 2025-01-01
Supplement: d5cp00538h1.zip [file d5cp00538h1.zip]

# Comparative study of CO<sub>2</sub> adsorption in a series of zeolites

Loïc Bénariac-Doumal<sup>1,a</sup>, Irena Deroche<sup>2,3</sup>, Habiba Nouali<sup>2,3</sup>, Jean-Louis Paillaud<sup>2,3</sup>, Taylan Ors<sup>2</sup>, Andrew N. Fitch<sup>1</sup> and Catherine Dejoie<sup>1,a</sup>

<sup>1</sup> European Synchrotron Radiation Facility, 71 avenue des Martyrs 38000 Grenoble, France

<sup>2</sup> Université de Haute Alsace, IS2M, 15 rue Jean Starcky 68057 Mulhouse, France

<sup>3</sup> Université de Strasbourg 67000 Strasbourg, France

<sup>a</sup> [loic.benariac@orange.fr](mailto:loic.benariac@orange.fr); [catherine.dejoie@esrf.fr](mailto:catherine.dejoie@esrf.fr)

## Structural description

**Table S1:** Refinement results for CO<sub>2</sub>@Si-STT

| Pressure (bar) | No. of CO <sub>2</sub> molecules (puc) | a (Å)       | b (Å)        | c (Å)       | β (°)         | Volume (Å <sup>3</sup> ) | Distances Si-O (Å)  | Angles O-Si-O (°) | Angles Si-O-Si (°) | Rwp   | Rp    | Rexp  |
|----------------|----------------------------------------|-------------|--------------|-------------|---------------|--------------------------|---------------------|-------------------|--------------------|-------|-------|-------|
| <b>0</b>       | 0                                      | 13.12121(4) | 21.75469(7)  | 13.71238(4) | 102.51250(18) | 3821.20(2)               | 1.572(8)-1.651(8)   | 108.7(4)-110.2(4) | 135.0(5)-171.0(4)  | 6.167 | 6.225 | 1.410 |
| <b>1.25</b>    | 2.79(3)                                | 13.12359(4) | 21.75549(7)  | 13.70843(4) | 102.51732(19) | 3820.87(2)               | 1.577(9)-1.650(8)   | 108.8(4)-110.2(4) | 134.7(5)-169.3(5)  | 6.279 | 6.138 | 1.399 |
| <b>1.5</b>     | 3.34(3)                                | 13.12373(4) | 21.75540(7)  | 13.70783(4) | 102.51815(19) | 3820.71(2)               | 1.573(9)-1.653(9)   | 108.7(4)-110.2(5) | 135.0(6)-169.1(5)  | 6.262 | 6.081 | 1.394 |
| <b>1.75</b>    | 3.83(3)                                | 13.12394(4) | 21.75550(7)  | 13.70731(4) | 102.5191(2)   | 3820.63(2)               | 1.576(9)-1.650(8)   | 108.8(4)-110.2(5) | 134.7(6)-169.4(5)  | 6.302 | 6.054 | 1.387 |
| <b>2</b>       | 4.45(3)                                | 13.12415(4) | 21.75536(7)  | 13.70664(4) | 102.5204(2)   | 3820.46(2)               | 1.578(9)-1.649(8)   | 108.8(4)-110.2(5) | 134.5(6)-169.5(5)  | 6.328 | 6.011 | 1.393 |
| <b>2.5</b>     | 5.27(3)                                | 13.12442(5) | 21.75566(8)  | 13.70613(5) | 102.5222(2)   | 3820.42(2)               | 1.575(9)-1.651(9)   | 108.7(5)-110.2(5) | 134.8(6)-169.3(5)  | 6.476 | 6.101 | 1.394 |
| <b>3</b>       | 6.12(3)                                | 13.12486(5) | 21.75623(8)  | 13.70562(5) | 102.5249(2)   | 3820.47(2)               | 1.577(9)-1.649(9)   | 108.7(5)-110.2(5) | 134.6(6)-169.4(5)  | 6.574 | 6.103 | 1.384 |
| <b>3.5</b>     | 7.15(3)                                | 13.12555(5) | 21.75730(8)  | 13.70540(5) | 102.5283(2)   | 3820.74(2)               | 1.571(10)-1.653(10) | 108.7(5)-110.2(5) | 135.0(6)-169.2(6)  | 6.738 | 6.168 | 1.379 |
| <b>4</b>       | 7.91(4)                                | 13.12617(5) | 21.75842(8)  | 13.70537(5) | 102.5323(2)   | 3821.06(3)               | 1.576(10)-1.649(10) | 108.8(5)-110.2(5) | 134.6(6)-169.7(6)  | 6.901 | 6.275 | 1.376 |
| <b>5</b>       | 8.73(4)                                | 13.12705(5) | 21.75974(9)  | 13.70550(5) | 102.5372(2)   | 3821.51(3)               | 1.573(11)-1.651(10) | 108.7(5)-110.2(5) | 134.8(7)-169.4(6)  | 7.047 | 6.328 | 1.376 |
| <b>7.5</b>     | 9.79(4)                                | 13.12871(6) | 21.76241(9)  | 13.70601(6) | 102.5456(3)   | 3822.48(3)               | 1.577(11)-1.649(11) | 108.8(6)-110.2(6) | 134.6(7)-169.8(6)  | 7.306 | 6.450 | 1.372 |
| <b>10</b>      | 10.59(4)                               | 13.13045(6) | 21.76460(10) | 13.70662(6) | 102.5525(3)   | 3823.43(3)               | 1.577(11)-1.649(11) | 108.8(6)-110.2(6) | 134.5(7)-169.9(6)  | 7.484 | 6.557 | 1.366 |
| <b>12.5</b>    | 11.02(4)                               | 13.13154(6) | 21.76587(10) | 13.70672(6) | 102.5579(3)   | 3823.92(3)               | 1.568(12)-1.655(12) | 108.7(6)-110.2(6) | 135.2(8)-169.1(7)  | 7.617 | 6.653 | 1.362 |
| <b>15</b>      | 11.29(4)                               | 13.13254(6) | 21.76695(10) | 13.70699(6) | 102.5619(3)   | 3824.42(3)               | 1.574(12)-1.650(11) | 108.7(6)-110.2(6) | 134.7(8)-169.6(7)  | 7.671 | 6.637 | 1.356 |
| <b>20</b>      | 11.75(4)                               | 13.13387(6) | 21.76860(10) | 13.70733(6) | 102.5663(3)   | 3825.13(3)               | 1.574(12)-1.650(12) | 108.7(6)-110.2(6) | 134.8(8)-169.5(7)  | 7.817 | 6.755 | 1.349 |

**Table S2:** Refinement results for CO<sub>2</sub>@Si-CHA

| Pressure<br>(bar) | No. of CO <sub>2</sub><br>molecules<br>(puc) | a (Å)         | c (Å)         | Volume (Å <sup>3</sup> ) | Distances<br>Si-O (Å)   | Angles<br>O-Si-O (°)    | Angles<br>Si-O-Si (°)     | Rwp   | Rp    | Rexp  |
|-------------------|----------------------------------------------|---------------|---------------|--------------------------|-------------------------|-------------------------|---------------------------|-------|-------|-------|
| <b>0</b>          | 0                                            | 13.544354(12) | 14.747433(15) | 2342.953(5)              | 1.5906(6)-<br>1.6110(8) | 108.95(6)-<br>109.78(6) | 147.30(9)-<br>149.84(10)  | 7.381 | 4.714 | 1.355 |
| <b>0.5</b>        | 1.12(4)                                      | 13.544316(12) | 14.748070(16) | 2343.041(5)              | 1.5912(6)-<br>1.6109(9) | 108.95(7)-<br>109.78(7) | 147.35(10)-<br>149.89(11) | 7.319 | 4.649 | 1.353 |
| <b>2</b>          | 4.33(3)                                      | 13.538547(11) | 14.755406(14) | 2342.210(4)              | 1.5897(6)-<br>1.6113(6) | 108.95(7)-<br>109.78(6) | 147.37(10)-<br>149.95(10) | 7.306 | 4.782 | 1.336 |
| <b>2.5</b>        | 5.49(3)                                      | 13.537790(12) | 14.758353(15) | 2342.416(5)              | 1.5898(6)-<br>1.6115(6) | 108.94(7)-<br>109.78(6) | 147.38(10)-<br>149.96(11) | 7.395 | 4.941 | 1.328 |
| <b>3</b>          | 6.13(3)                                      | 13.537716(11) | 14.760172(15) | 2342.679(5)              | 1.5896(6)-<br>1.6116(6) | 108.94(7)-<br>109.79(6) | 147.36(10)-<br>149.95(11) | 7.444 | 4.988 | 1.370 |
| <b>3.5</b>        | 6.49(3)                                      | 13.537557(11) | 14.761220(15) | 2342.791(4)              | 1.5897(6)-<br>1.6117(6) | 108.94(7)-<br>109.79(6) | 147.39(10)-<br>149.97(11) | 7.401 | 4.996 | 1.315 |
| <b>4</b>          | 6.87(3)                                      | 13.537621(11) | 14.762174(15) | 2342.964(4)              | 1.5896(6)-<br>1.6119(6) | 108.94(7)-<br>109.78(6) | 147.36(10)-<br>149.95(11) | 7.439 | 5.004 | 1.316 |
| <b>5</b>          | 7.39(3)                                      | 13.537976(12) | 14.763202(16) | 2343.250(5)              | 1.5897(7)-<br>1.6120(6) | 108.94(7)-<br>109.78(6) | 147.37(10)-<br>149.97(11) | 7.507 | 5.109 | 1.315 |
| <b>7.5</b>        | 8.19(3)                                      | 13.539404(11) | 14.764678(15) | 2343.979(5)              | 1.5898(7)-<br>1.6124(6) | 108.94(7)-<br>109.78(6) | 147.34(10)-<br>149.94(11) | 7.549 | 5.117 | 1.306 |
| <b>10</b>         | 8.66(3)                                      | 13.540354(14) | 14.765215(17) | 2344.393(5)              | 1.5899(7)-<br>1.6123(6) | 108.94(7)-<br>109.78(6) | 147.34(10)-<br>149.94(11) | 7.684 | 5.220 | 1.301 |
| <b>12.5</b>       | 9.03(3)                                      | 13.541427(13) | 14.765814(16) | 2344.860(5)              | 1.5901(6)-<br>1.6126(6) | 108.94(6)-<br>109.78(4) | 147.35(10)-<br>149.94(6)  | 7.677 | 5.175 | 1.295 |
| <b>15</b>         | 9.22(3)                                      | 13.542319(12) | 14.766278(16) | 2345.243(5)              | 1.5899(7)-<br>1.6130(6) | 108.94(7)-<br>109.78(6) | 147.33(10)-<br>149.92(11) | 7.680 | 5.157 | 1.294 |
| <b>20</b>         | 9.58(4)                                      | 13.543804(13) | 14.766656(17) | 2345.817(5)              | 1.5904(7)-<br>1.6122(6) | 108.94(7)-<br>109.78(6) | 147.36(11)-<br>149.97(12) | 7.728 | 5.215 | 1.303 |

**Table S3:** Refinement results for CO<sub>2</sub>@Na-LTA

| Pressure (bar) | No. of CO <sub>2</sub> molecules (puc) | a (Å)       | Volume (Å <sup>3</sup> ) | Distances Si-O (Å) | Distances Al-O (Å)  | Angles O-Si-O (°)       | Angles O-Al-O (°)  | Rwp   | Rp    | Rexp  |
|----------------|----------------------------------------|-------------|--------------------------|--------------------|---------------------|-------------------------|--------------------|-------|-------|-------|
| <b>0</b>       | 0                                      | 24.57698(6) | 14845.19(11)             | 1.600(6)- 1.611(3) | 1.701(6)- 1.711(4)  | 108.8(3)- 109.8(3)      | 108.9(3)-110.0(3)  | 7.198 | 5.870 | 2.128 |
| <b>1</b>       | 19.56(17)                              | 24.55821(5) | 14811.19(8)              | 1.590(6)- 1.616(4) | 1.687(6)- 1.716(4)  | 109.1(3)- 109.6(3)      | 109.2(3)- 109.8(3) | 6.787 | 5.619 | 2.363 |
| <b>1.25</b>    | 22.62(16)                              | 24.55508(4) | 14805.53(8)              | 1.591(6)- 1.613(8) | 1.688(6)- 1.709(8)  | 109.3(3)-<br>109.55(16) | 109.4(3)- 109.6(3) | 6.771 | 5.491 | 1.910 |
| <b>1.5</b>     | 26.29(16)                              | 24.55279(5) | 14801.39(8)              | 1.588(6)- 1.616(8) | 1.685(6)-1.713(8)   | 109.3(3)-<br>109.56(17) | 109.4(2)- 109.6(3) | 6.984 | 5.604 | 1.986 |
| <b>1.75</b>    | 30.42(17)                              | 24.55126(5) | 14798.63(9)              | 1.589(6)- 1.615(8) | 1.686(6)- 1.711(8)  | 109.3(3)-<br>109.55(17) | 109.4(2)- 109.6(3) | 7.110 | 5.680 | 2.000 |
| <b>2</b>       | 34.91(17)                              | 24.55045(5) | 14797.17(9)              | 1.590(6)- 1.614(8) | 1.687(6)- 1.710(9)  | 109.3(3)-<br>109.55(17) | 109.4(2)- 109.6(3) | 7.203 | 5.744 | 1.989 |
| <b>2.5</b>     | 38.80(17)                              | 24.55061(5) | 14797.45(10)             | 1.589(7)- 1.615(9) | 1.686(7)- 1.712(9)  | 109.3(3)-<br>109.55(17) | 109.4(2)- 109.6(3) | 7.472 | 5.906 | 1.987 |
| <b>3</b>       | 42.63(18)                              | 24.55165(6) | 14799.33(10)             | 1.590(7)- 1.614(9) | 1.687(7)- 1.711(9)  | 109.3(3)-<br>109.56(17) | 109.4(2)- 109.6(3) | 7.587 | 5.972 | 1.997 |
| <b>3.5</b>     | 45.05(18)                              | 24.55298(6) | 14801.74(10)             | 1.590(7)- 1.615(9) | 1.688(7)- 1.711(9)  | 109.3(3)-<br>109.56(18) | 109.4(2)- 109.6(3) | 7.774 | 6.104 | 2.002 |
| <b>4</b>       | 47.43(18)                              | 24.55452(6) | 14804.52(11)             | 1.589(7)-1.617(10) | 1.686(7)- 1.713(10) | 109.3(3)-<br>109.56(18) | 109.4(2)- 109.6(3) | 7.991 | 6.078 | 2.012 |
| <b>5</b>       | 48.54(18)                              | 24.55629(6) | 14807.73(10)             | 1.589(7)- 1.617(9) | 1.687(7)- 1.713(9)  | 109.3(3)-<br>109.56(17) | 109.4(2)- 109.6(3) | 7.954 | 6.226 | 2.011 |
| <b>7.5</b>     | 51.26(18)                              | 24.55917(6) | 14812.93(10)             | 1.590(7)- 1.617(9) | 1.687(7)- 1.713(9)  | 109.3(3)-<br>109.55(17) | 109.4(2)- 109.6(3) | 8.057 | 6.241 | 2.009 |
| <b>10</b>      | 52.65(19)                              | 24.56195(6) | 14817.97(11)             | 1.590(7)- 1.617(9) | 1.688(7)- 1.713(9)  | 109.3(3)-<br>109.56(17) | 109.4(2)- 109.6(3) | 8.175 | 6.349 | 2.009 |
| <b>12.5</b>    | 53.98(19)                              | 24.56437(6) | 14822.35(11)             | 1.591(7)- 1.616(9) | 1.689(7)- 1.712(9)  | 109.3(3)-<br>109.56(17) | 109.4(2)- 109.6(3) | 8.258 | 6.367 | 2.012 |
| <b>15</b>      | 55.30(19)                              | 24.56638(6) | 14825.98(11)             | 1.588(7)- 1.621(9) | 1.685(7)- 1.717(9)  | 109.3(3)-<br>109.54(17) | 109.4(2)- 109.6(3) | 8.329 | 6.412 | 2.013 |
| <b>20</b>      | 56.51(19)                              | 24.56885(6) | 14830.46(11)             | 1.592(7)- 1.616(9) | 1.689(7)- 1.713(9)  | 109.3(3)-<br>109.56(17) | 109.4(2)- 109.6(3) | 8.329 | 6.410 | 2.006 |

**Table S4:** Refinement results for CO<sub>2</sub>@Na-FAU

| Pressure (bar) | No. of CO <sub>2</sub> molecules (puc) | a (Å)       | Volume (Å <sup>3</sup> ) | Distances T1-O (Å)     | Distances T2-O (Å)      | Angles O-T1-O (°)  | Angles O-T2-O (°)  | Rwp   | Rp    | Rexp  |
|----------------|----------------------------------------|-------------|--------------------------|------------------------|-------------------------|--------------------|--------------------|-------|-------|-------|
| <b>0</b>       | 0                                      | 25.03146(5) | 15684.06(10)             | 1.613(10)-<br>1.630(7) | 1.686(9)- 1.739(8)      | 108.7(4)- 110.1(5) | 109.0(4)- 110.4(3) | 6.971 | 5.326 | 1.055 |
| <b>2</b>       | 18.6(4)                                | 25.02031(5) | 15663.12(10)             | 1.615(12)-<br>1.632(9) | 1.688(11)-<br>1.742(10) | 108.7(5)- 110.0(6) | 109.0(5)- 110.4(4) | 7.689 | 5.668 | 1.049 |
| <b>2.5</b>     | 27.5(3)                                | 25.01058(5) | 15644.85(9)              | 1.613(11)-<br>1.635(9) | 1.685(10)-<br>1.747(9)  | 108.7(4)- 109.9(6) | 108.9(5)- 110.4(4) | 7.480 | 5.684 | 1.047 |
| <b>3</b>       | 39.8(3)                                | 24.99780(5) | 15620.88(9)              | 1.615(8)- 1.627(7)     | 1.688(8)- 1.738(7)      | 108.7(4)- 110.0(4) | 108.9(4)- 110.5(3) | 6.781 | 5.114 | 1.038 |
| <b>3.5</b>     | 52.3(3)                                | 24.99189(5) | 15609.81(9)              | 1.614(7)- 1.627(7)     | 1.687(8)- 1.738(8)      | 108.7(4)- 110.0(4) | 109.0(4)- 110.5(3) | 7.084 | 5.332 | 1.028 |
| <b>4</b>       | 61.4(3)                                | 24.99217(5) | 15610.32(9)              | 1.613(8)- 1.632(6)     | 1.684(6)- 1.743(7)      | 108.6(3)- 110.0(4) | 108.9(3)- 110.4(3) | 6.989 | 5.302 | 1.018 |
| <b>5</b>       | 65.0(3)                                | 24.99436(5) | 15614.42(9)              | 1.612(8)- 1.635(6)     | 1.681(6)- 1.747(7)      | 108.6(3)- 109.9(4) | 108.9(3)- 110.5(3) | 7.056 | 5.403 | 1.019 |
| <b>7.5</b>     | 68.0(3)                                | 24.99756(5) | 15620.42(9)              | 1.614(7)- 1.631(6)     | 1.685(6)- 1.741(6)      | 108.7(3)- 110.0(4) | 108.9(3)- 110.5(3) | 6.980 | 5.352 | 1.021 |
| <b>10</b>      | 70.1(3)                                | 25.00083(5) | 15626.55(9)              | 1.613(7)- 1.636(6)     | 1.681(6)- 1.748(6)      | 108.7(3)- 109.9(4) | 108.9(3)- 110.4(3) | 7.031 | 5.408 | 1.021 |
| <b>12.5</b>    | 71.2(3)                                | 25.00390(5) | 15632.32(9)              | 1.614(7)- 1.633(6)     | 1.685(6)- 1.744(6)      | 108.7(3)- 110.0(4) | 108.9(3)- 110.5(3) | 7.026 | 5.463 | 1.019 |
| <b>15</b>      | 73.3(3)                                | 25.00650(5) | 15637.18(9)              | 1.615(6)- 1.628(6)     | 1.687(6)- 1.738(6)      | 108.6(3)-110.0(4)  | 108.9(3)- 110.5(3) | 7.039 | 5.444 | 1.013 |
| <b>20</b>      | 72.6(3)                                | 25.00961(5) | 15643.02(9)              | 1.613(10)-<br>1.635(8) | 1.684(8)- 1.746(8)      | 108.7(4)- 110.0(5) | 108.9(4)- 110.5(3) | 7.342 | 5.592 | 1.003 |

T1: Si/T2: 0.9Al:0.1Si

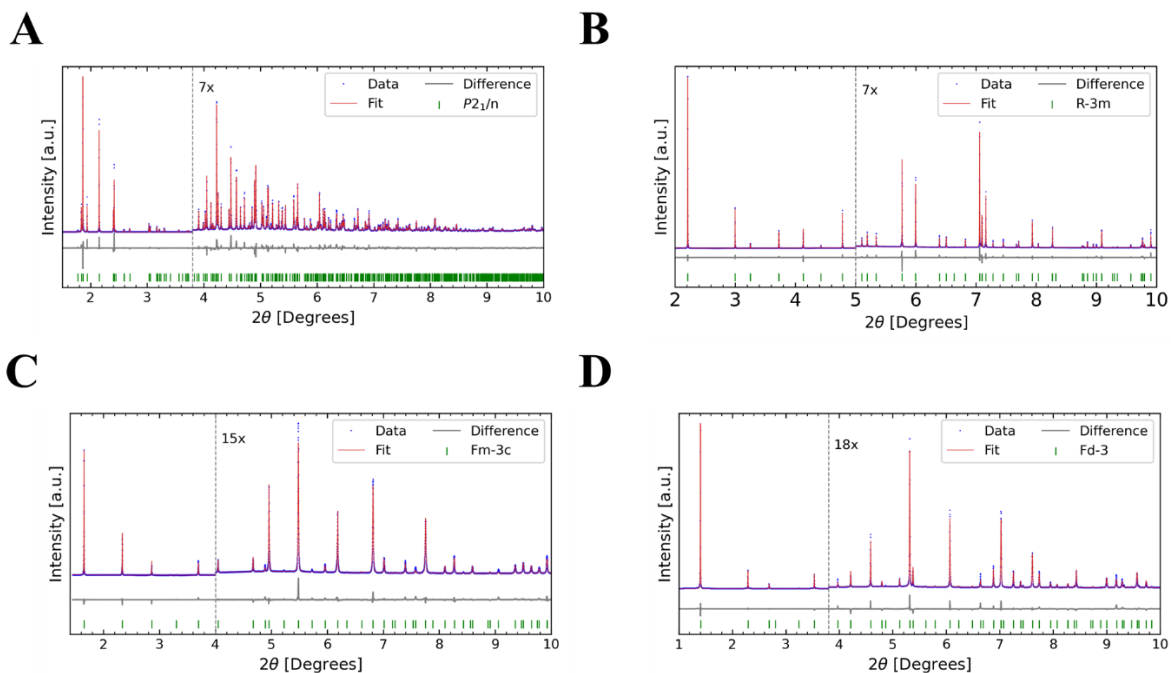

**Figure S1:** Rietveld refinement at 0 bar of A- Si-STT (Rwp: 6.256 %, Rp: 6.309 %, Rexp: 1.41 % ), B- Si-CHA (Rwp: 7.381 %, Rp: 4.714 %, Rexp: 1.355 % ), C- Na-LTA (Rwp: 7.212 %, Rp: 5.758 %, Rexp: 2.128 % ), and D- Na-FAU (Rwp: 7.104 %, Rp: 5.362 %, Rexp: 1.055 %) at 298K (blue: experimental; red: calculated; grey: difference,  $\lambda = 0.354180(1)$  Å).

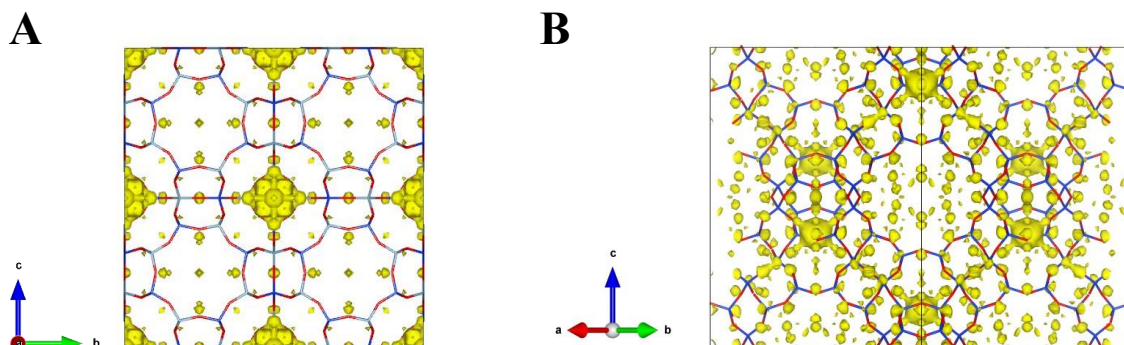

**Figure S2:** Fourier difference map for Na-LTA (A) and Na-FAU (B), evidencing remaining water in the pores as residual electronic density.

**Table S5:** Interaction between the oxygen atoms of specific sites and either the cations, the framework oxygen atoms, or those from water molecules.

|               | <b>Omol12</b>                                  | <b>Omol13</b>                 | <b>Omol22</b>                               | <b>Omol23</b>            |
|---------------|------------------------------------------------|-------------------------------|---------------------------------------------|--------------------------|
| <b>Na-LTA</b> | Na2: 2.55-3.06<br>Ow3: 2.93<br>Ow5: 2.665-2.93 | Na1: 2.80<br>Ow5: 2.576-2.972 |                                             |                          |
| <b>Na-FAU</b> | Na3: 2.796<br>OW6: 3.038                       | OW6: 2.781<br>O4: 2.845       | Na2: 2.704<br>Na3: 2.906-2.931<br>OW6: 3.03 | Na3: 2.988<br>OW6: 2.527 |

## Computational methodology

### 1. Adsorbent and adsorbate microscopic models

The atomic positions for the investigated zeolites were taken from the IZA database [1]. Table S5 summarizes the main features of the simulation boxes for each investigated zeolite structure. Si-CHA and Si-STT zeolite structures were simulated under their purely silicate chemical composition ( $\text{SiO}_2$ ), whereas Na-LTA and Na-FAU in aluminosilicated, charge compensating cations containing forms. In these two latter structures, Al atoms were distributed along the framework with respect to the Löwenstein rule. The zeolite systems are assumed to be semi-ionic, and the partial charge carried by zeolite atoms are detailed in Table S6. The  $\text{CO}_2$  molecules were described using the TrePPE-EH model [2], considering the  $\text{CO}_2$  molecule as rigid, with CO bond length equals to 1.16 Å. Finally,  $\text{H}_2\text{O}$  molecules were described using the five-site model, TIP5P, able to accurately reproduce liquid water density [3]. Within the frame of this model, positive electrostatic charges are beared by hydrogen atoms, whereas negative ones by lone-pair interaction sites, designed as L. The model assumes the geometry of the molecule fixed, with OH bond length of 0.9572 Å and HOH bond-angle of 104.52°.

**Table S6:** Chemical composition and size of the simulation boxes used in the GCMC.

| <b>Zeolite structure</b>                                              | <b>Si-STT</b>                        | <b>Si-CHA</b>                     | <b>Na-LTA</b>                                              | <b>Na-FAU</b>                                               |
|-----------------------------------------------------------------------|--------------------------------------|-----------------------------------|------------------------------------------------------------|-------------------------------------------------------------|
| <b>Unit cell chemical composition</b>                                 | $\text{Si}_{256}\text{O}_{512}$      | $\text{Si}_{256}\text{O}_{512}$   | $\text{Na}_{96}\text{Si}_{96}\text{Al}_{96}\text{O}_{384}$ | $\text{Na}_{92}\text{Si}_{100}\text{Al}_{92}\text{O}_{384}$ |
| <b>Unit cell dimensions</b><br>$a^*b^*c$<br>$\alpha^* \beta^* \gamma$ | 26.100 21.853 27.146<br>90 102.91 90 | 27.036 27.036 29.063<br>90 90 120 | 24.555 24.555 24.555<br>90 90 90                           | 25.028 25.028 25.028<br>90 90 90                            |
| <b>Simulation box constitution (nb of UC in each direction)</b>       | 2 x 1 x 2                            | 2 x 2 x 2                         | 1 x 1 x 1                                                  | 1 x 1 x 1                                                   |

### 2. The zeolite/adsorbate interaction potential

The intermolecular adsorbate/adsorbate and adsorbate/zeolite interactions were modeled using a sum of the repulsion-dispersion and the electrostatic potential expressed via the Lennard-Jones (LJ) and the Coulombic terms, as described in Equation S1:

$$U_{ij}^{\text{Inter}} = 4\varepsilon_{ij}[(\frac{\sigma_{ij}}{r_{ij}})^{12} - (\frac{\sigma_{ij}}{r_{ij}})^6] + \frac{q_i q_j}{4\pi\varepsilon_0 r_{ij}} \quad (\text{S1})$$

where  $q_i$  and  $q_j$  are the electrostatic sites partial charges,  $r_{ij}$  is the distance separating two interacting sites, and  $\varepsilon_{ij}$  and  $\sigma_{ij}$  are the corresponding LJ interatomic potential parameters. The LJ interatomic parameters as well as the partial atomic charges for both, purely siliceous and aluminosilicated zeolites were taken from the Clay force field [4]. Whereas a LJ interaction site is placed on each atom of the CO<sub>2</sub> molecule in the Trappe-EH model [2], in the TIP5P model of water molecule solely oxygen atoms constitute LJ interaction sites. The whole set of all applied parameters is reported in Table S7. Finally, the cross-term Lennard-Jones parameters were calculated through the Lorentz-Berthelot mixing rule. The refined and simulated occupancies of sodium cation sites in Na-LTA and Na-FAU are summarized in Table S8.

**Table S7:** Lennard-Jones ( $\varepsilon$ ,  $\sigma$ ) parameters and partial atomic charges ( $q$ ) carried by zeolite and CO<sub>2</sub> molecules, as a function of the chemical composition of the zeolite.

| Atom                                                   | $\varepsilon/k_B$ (K) | $\sigma$ (Å) | $q(e)$ |
|--------------------------------------------------------|-----------------------|--------------|--------|
| C(CO <sub>2</sub> )                                    | 27.0                  | 2.80         | 0.70   |
| O(CO <sub>2</sub> )                                    | 79.0                  | 3.05         | -0.35  |
| O (SiO <sub>2</sub> zeolite)                           | 78.20                 | 3.17         | -1.05  |
| Si (zeolite)                                           | $0.93 \times 10^{-3}$ | 3.30         | 2.10   |
| O (AlSi zeolite)                                       | 78.20                 | 3.17         | -1.165 |
| Al (Na-FAU)                                            | $0.93 \times 10^{-3}$ | 3.30         | 1.78   |
| Al (Na-LTA)                                            | $0.93 \times 10^{-3}$ | 3.30         | 1.76   |
| Na <sup>+</sup>                                        | 65.47                 | 2.35         | 0.80   |
| H(H <sub>2</sub> O)                                    | 0                     | 0            | 0.241  |
| O(H <sub>2</sub> O)                                    | 80.52                 | 3.12         | 0      |
| L(H <sub>2</sub> O)<br>(lone pair<br>interaction site) | 0                     | 0            | -0.241 |

**Table S8:** Comparaison of Na<sup>+</sup> site occupancies in Na-LTA and Na-FAU from Rietveld refinement and simulation.

|                           | Na-LTA |      | Na-FAU |      |      |
|---------------------------|--------|------|--------|------|------|
| Site Na <sup>+</sup>      | I      | II   | I'     | II   | III' |
| Occupancy from refinement | 1      | 0.33 | 0.81   | 1    | 0.29 |
| Occupancy from simulation | 1      | 0.33 | 0.71   | 0.98 | 0.39 |

### 3. Grand Canonical Monte Carlo (GCMC) simulation

Absolute adsorption isotherms of CO<sub>2</sub> were simulated in the purely silicated Si-STT and Si-CHA zeolites and the cationic Na-LTA and Na-FAU zeolites, at the temperature of 298 K. For that purpose, we have applied the GCMC method [5], implemented within the 8.2.3 version of the Towhee code [6]. These simulations consisted of evaluating the average number of carbon dioxide molecules whose chemical potential values equal those of the bulk phase for a given pressure and temperature. Beforehand, a MC simulation in the NpT ensemble was applied to calculate the chemical potential through the Widom method [5]. Several previous studies have shown the necessity of relaxing the charge-compensating cations during the GCMC simulation of adsorption to correctly sample the configurational space [7]. Consequently, while keeping the framework rigid (Si, Al, and zeolite O atoms), the extra-framework cations were allowed to displace. The system was first equilibrated during a period of  $1.10^7$  MC steps and the subsequent period of  $2.10^7$  MC steps was used for the production phase. We employed the following MC moves: CO<sub>2</sub> molecule creations and deletion, CO<sub>2</sub> molecule center of mass translation and center of mass rotation, CO<sub>2</sub> molecule and sodium cation intra-box swap move, and sodium cation translation. In simulations with fixed number of H<sub>2</sub>O molecules, we additionally applied translation, rotation and intra-box swap moves to water molecules. The maximum displacements for translation and rotation moves were adjusted to yield an acceptance rates close to 50%. The periodic conditions were applied in all directions of the space. The Ewald summation technique was used in the calculation of the long-range electrostatic interactions. A short-range repulsion–dispersion interaction cut-off of 12.5 Å was applied. Furthermore, as the CO<sub>2</sub> molecule kinetic diameter is higher (~3.3 Å) than the one of the six-membered ring window of the sodalite cages (~2.2 Å), carbon dioxide cannot access the sodalite cages [8]. Consequently, in our simulations, access to sodalite cages was prohibited for CO<sub>2</sub> molecules and allowed for water molecules. Finally, in order to study the structure of the adsorbed CO<sub>2</sub> molecules, in presence and absence of water molecules, we performed MC simulations in ensemble NVT and we have recorded the CO<sub>2</sub>, Na<sup>+</sup> and H<sub>2</sub>O configurations every 1000 steps during the MC runs. These configurations were subsequently used to report the radial distribution functions for sodium cations in various crystallographic sites and oxygen atoms of the CO<sub>2</sub> molecule (Fig. S3) as well as the cumulated snapshots, showing the CO<sub>2</sub> molecules' localizations.

We have achieved complementary NVT-MC simulations for the saturation loading (20 bar) in all studied structures. Thus, we could determine the site occupation factors for each experimentally identified CO<sub>2</sub> crystallographic site. These results are summarized in Table S9, which presents the site-specific occupancies derived from the simulations, allowing direct comparison with experimental data.



**Table S9:** Comparaison CO<sub>2</sub> site occupancies for each zeolite from Rietveld refinement and NVT-MC simulation.

|                                       |                    | <b>Si-STT</b> | <b>Si-CHA</b> | <b>Na-LTA</b> | <b>Na-FAU</b> |
|---------------------------------------|--------------------|---------------|---------------|---------------|---------------|
| <b>Site<br/>occupancy of<br/>mol1</b> | From<br>refinement | 0.82          | 0.36          | 0.29          | 0.4           |
|                                       | From<br>simulation | 0.97          | 0.34          | 0.28          | 0.27          |
| <b>Site<br/>occupancy of<br/>mol2</b> | From<br>refinement | 0.72          | 0.34          |               | 0.38          |
|                                       | From<br>simulation | 0.66          | 0.55          |               | 0.35          |
| <b>Site<br/>occupancy of<br/>mol3</b> | From<br>refinement | 0.65          |               |               |               |
|                                       | From<br>simulation | 0.69          |               |               |               |
| <b>Site<br/>occupancy of<br/>mol4</b> | From<br>refinement | 0.76          |               |               |               |
|                                       | From<br>simulation | 0.70          |               |               |               |

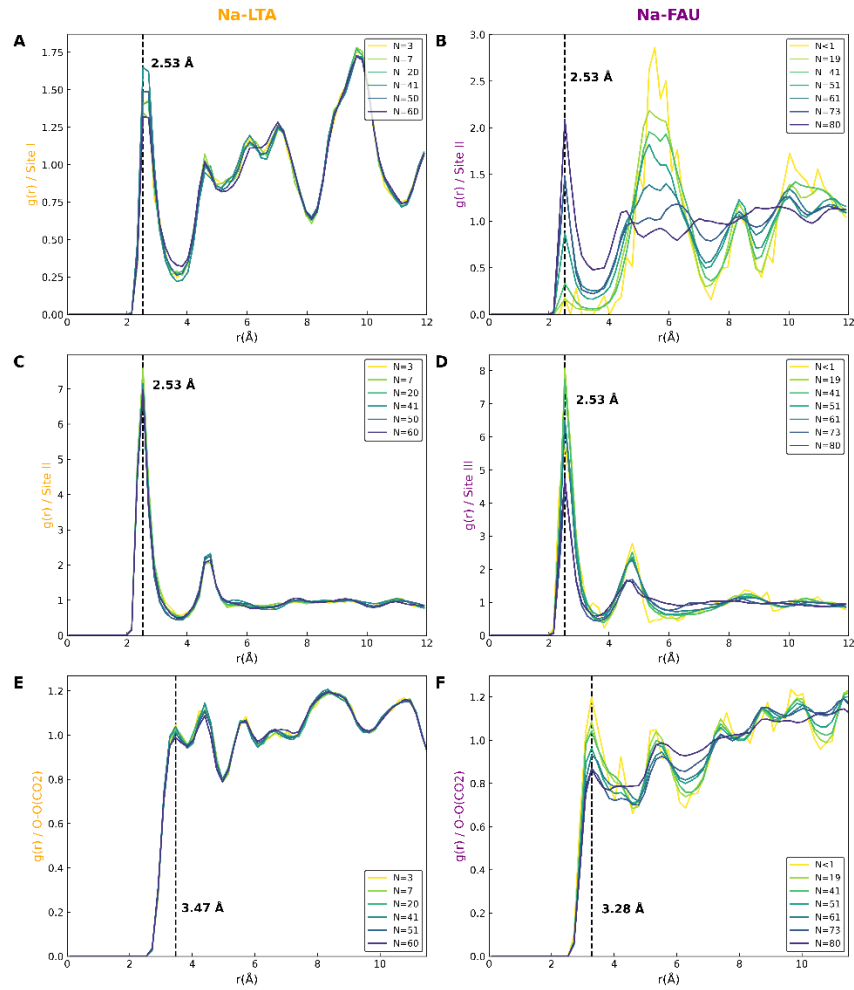

**Figure S3:** RDFs for oxygen atom of the CO<sub>2</sub> and sodium cations for Na-LTA (A, C), Na-FAU (B, D), and oxygen atom of the framework and oxygen atom of the CO<sub>2</sub> for Na-LTA (E) and Na-FAU (F).  $N$  represents the number of CO<sub>2</sub> molecules present in each simulation.

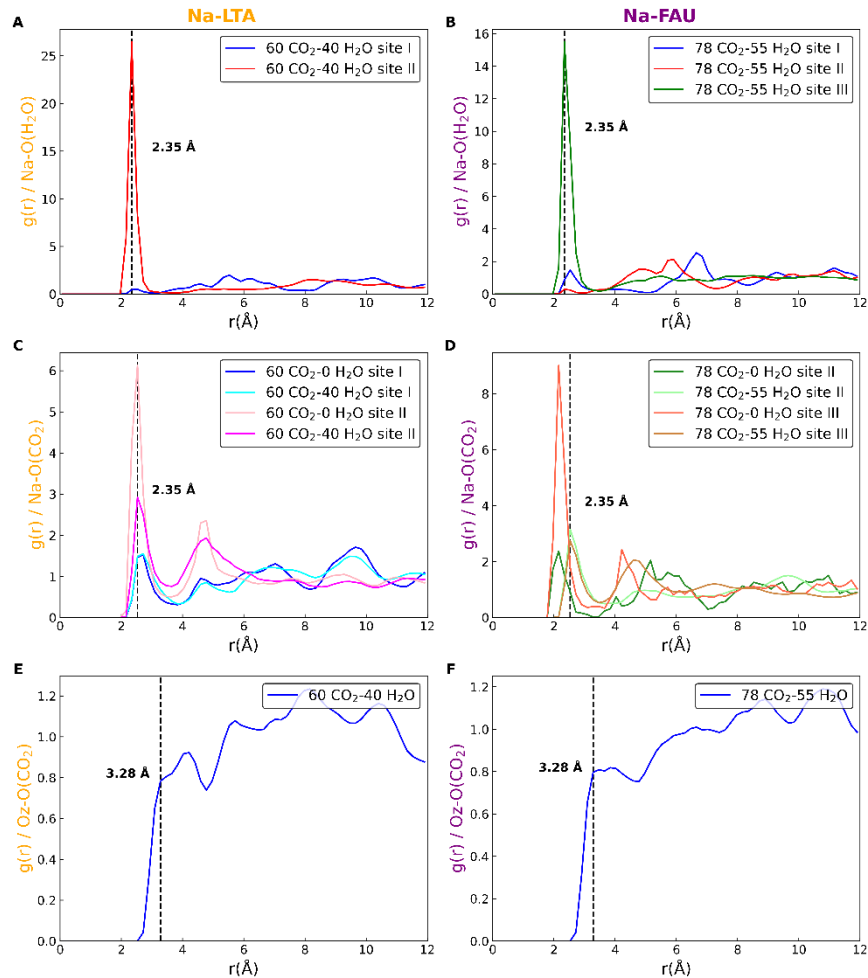

**Figure S4:** RDFs for oxygen atom of the CO<sub>2</sub> and sodium cations for Na-LTA (A, C), Na-FAU (B, D), and oxygen atom of the framework and oxygen atom of the CO<sub>2</sub> for Na-LTA (E) and Na-FAU (F) in the presence of water. The experimental condition, defined by the number of CO<sub>2</sub> and H<sub>2</sub>O molecules, is indicated in the legend.

## In-situ crystallographic study

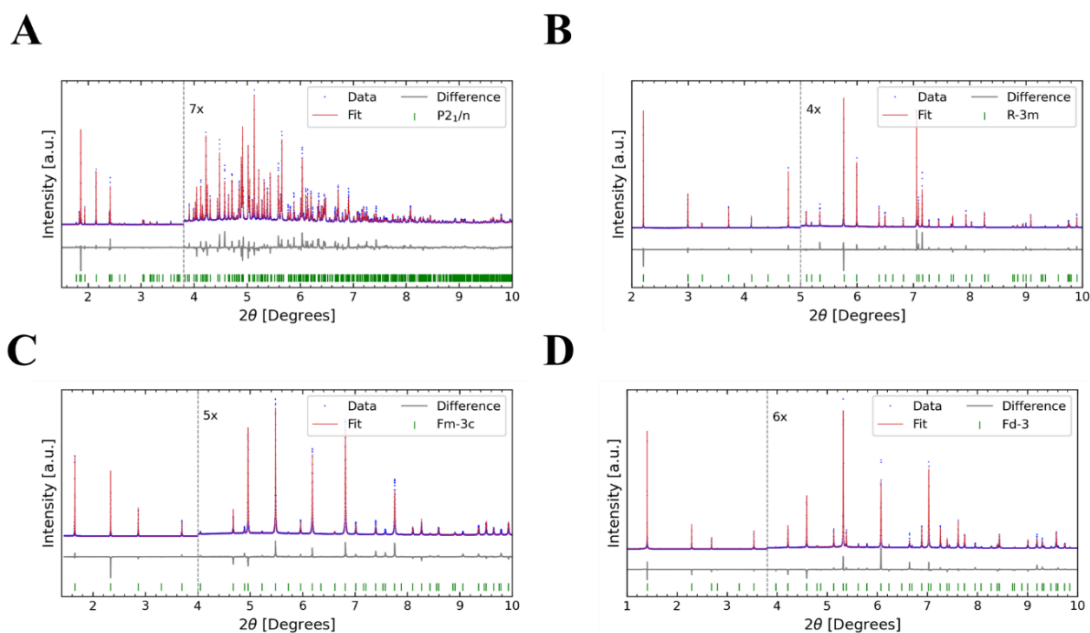

**Figure S5:** Rietveld refinement at 20 bar of A- Si-STT (Rwp: 7.875 %, Rp: 6.828 %, Rexp: 1.349 %), B- Si-CHA (Rwp: 7.726 %, Rp: 5.212 %, Rexp: 1.303 %), C- Na-LTA (Rwp: 8.359 %, Rp: 6.329 %, Rexp: 2.006 %), and D- Na-FAU (Rwp: 7.458 %, Rp: 5.665 %, Rexp: 1.003 %) at 298K (blue: experimental; red: calculated; grey: difference,  $\lambda = 0.354180(1)$  Å).

## CO<sub>2</sub> parametric refinements and isotherm fitting

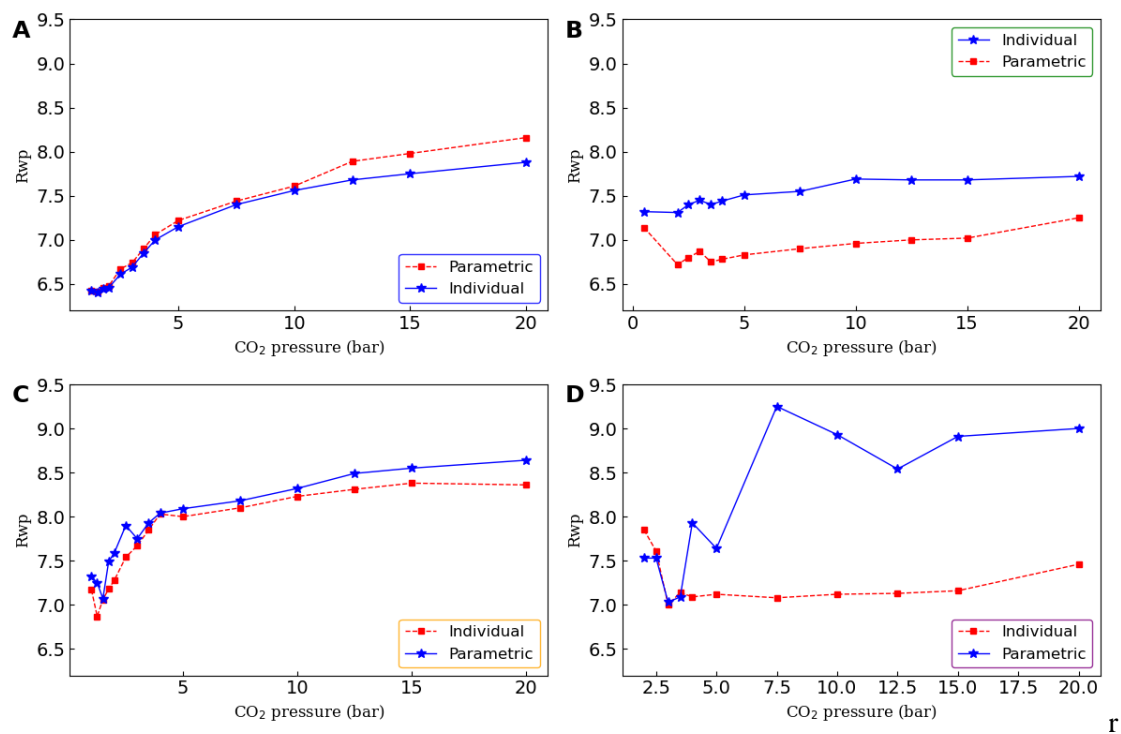

**Figure S6:** Evolution of Rwp for Rietveld refinement compared to parametric refinement for (A) Si-STT, (B) Si-CHA, (C) Na-LTA, and (D) Na-FAU.

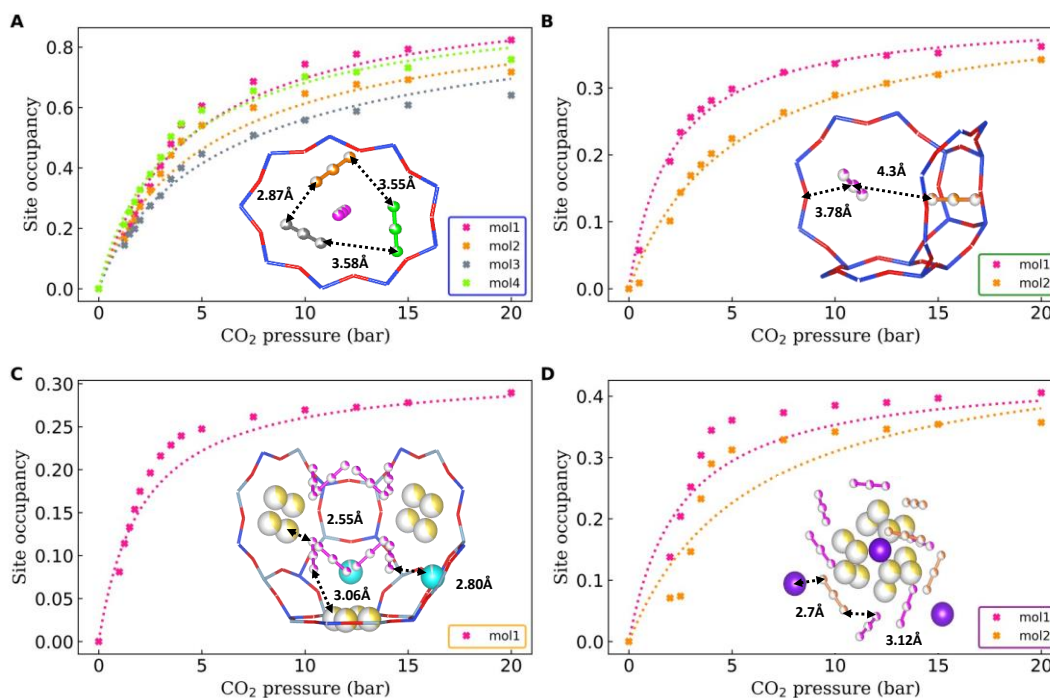

**Figure S7:** The evolution of the different sites as a function of CO<sub>2</sub> loading pressure, obtained from parametric refinements (dotted lines) and from classic refinements (cross markers), is also shown for comparison. The crystallographic model of each zeolite at 20 bar is also displayed in each subplot. A – Si-STT; B – Si-CHA; C – Na-LTA; D – Na-FAU.

## References

- [1] Database of Zeolite Structures, <http://www.iza-structure.org/databases/> (accessed on 10 November 2024).
- [2] J. Potoff and J. Ilja Siepmann, *AIChE Journal*, 2001, **47**, 1676–1682.
- [3] M.W. Mahoney and W.L. Jorgensen, *J. Chem. Phys.*, 2000, **112**, 8910–8922.
- [4] R. Cygan, J. Liang and A. Kalinichev, *The Journal of Physical Chemistry B*, 2004, **108**, 1255–1266.
- [5] D. Dubbeldam, A. Torres-Knoop and K. Walton, *Mol. Simul.*, 2013, **39**, 1253–1292.
- [6] M. Martin, *Mol. Simul.*, 2013, **39**, 1212–1222.
- [7] J. Castillo, J. Silvestre-Albero, F. Rodriguez-Reinoso, T. Vlugt and S. Calero, *Physical Chemistry Chemical Physics*, 2013, **15**, 17374–17382.
- [8] G. Maurin, P. Llewellyn and R. Bell, *The Journal of Physical Chemistry B*, 2005, **109**, 16084–16091.
